# Supplementary material for: Germline DNA Copy Number Aberrations Identified as Potential Prognostic Factors for Breast Cancer Recurrence
Source: PLoS One. 2013 Jan 16;8(1):e53850. doi: 10.1371/journal.pone.0053850 (PMC3547038; doi:10.1371/journal.pone.0053850)
Supplement: Table S3 — Relationship of top ten CNAs ( Tables 2 and 4 ) with BCR in luminal B, HER2 type and triple negative subtypes of breast cancer samples. (XLSX) [file pone.0053850.s003.xlsx]

## Sheet: Table S3
Table S3: Relationship of top ten CNAs (Tables 2 and 4) with BCR in luminal B, HER2 type and triple negative subtypes of breast cancer samples
Chromosomal regionsa	Event	Luminal B (n=60)			HER2 type (n=24)			Triple negative (n=42)
		No. of events	P valueb		No. of events	P valueb		No. of events	P valueb
chr16:70151941-70198049	CN Gain	2	2.89 x 10-3		2	0.129621		5	6.15 x 10-3
chr17:30556456-30568424	CN-LOH	9	0.0101159		4	0.549337		10	0.0781172
chr11:64169509-64201009	CN-LOH	5	0.131584		1	0.541232		4	5.35 10-4
chr17:30292345-30436095	CN-LOH	10	2.63 x 10-3		4	0.549337		10	0.0781172
chr19:53519960-53538651	CN Gain	7	0.959168		3	0.411017		10	0.5482
chr11:64228316-64258125	CN-LOH	6	0.792239		1	0.541232		6	0.109836
chr11:64048319-64143935	CN-LOH	5	0.131584		1	0.541232		5	0.155917
chr11:64228316-64285905	CN-LOH	6	0.792239		1	0.541232		5	0.219223
chr11:72198387-72208236	CN-LOH	5	0.0455308		1	0.690094		2	0.105077
chr6:140631638-140723307	CN-LOH	9	0.0728886		3	0.498798		5	0.444322
achromosomal positions are based on NCBI build 37; bP values obtained from log-rank tests with one degree of freedom
